# Impact of adiposity on muscle function and clinical events among elders with dynapenia, presarcopenia and sarcopenia: a community-based cross-sectional study

Tung-Wei Kao<sup>1,2</sup>, Tao-Chun Peng<sup>1</sup>, Wei-Liang Chen<sup>1</sup>, Der-Sheng Han<sup>2,3</sup>, Chi-Ling Chen<sup>2</sup>, Wei-Shiung Yang<sup>2,4,5</sup>

<sup>1</sup>Division of Geriatric Medicine, Department of Family and Community Medicine, Tri-Service General Hospital, National Defense Medical Center, Taipei, Taiwan

<sup>2</sup>Graduate Institute of Clinical Medicine, College of Medicine, National Taiwan University, Taipei, Taiwan

<sup>3</sup>Department of Physical Medicine and Rehabilitation, National Taiwan University Hospital BeiHu Branch, Taipei, Taiwan

<sup>4</sup>Department of Internal Medicine, National Taiwan University Hospital, Taipei, Taiwan

<sup>5</sup>Center for Obesity, Life Style and Metabolic Surgery, National Taiwan University Hospital, Taipei, Taiwan

**Correspondence to:** Wei-Shiung Yang; email: [wsyang@ntu.edu.tw](mailto:wsyang@ntu.edu.tw)

**Keywords:** dynapenia, obesity, fall, metabolic syndrome, fat to muscle ratio

**Received:** September 21, 2020

**Accepted:** January 14, 2021

**Published:** February 26, 2021

**Copyright:** © 2021 Kao et al. This is an open access article distributed under the terms of the [Creative Commons Attribution License](https://creativecommons.org/licenses/by/3.0/) (CC BY 3.0), which permits unrestricted use, distribution, and reproduction in any medium, provided the original author and source are credited.

## ABSTRACT

**Introduction:** Low muscle function determined unfavorable clinical outcome than low muscle mass; nevertheless, comparison of detrimental parameters among dynapenia, presarcopenia and sarcopenia was sparse. We hypothesized that adiposity is implicated in low muscle function related adverse events.

**Methods:** We recruited community elders to measure handgrip strength and walking speed. Using bioelectronics impedance analyzer to examine body compositions. The faller is indicated of having a fall event in the past one year. Associations of different obesity parameters, metabolic syndrome (MetS) and fall among the groups were analyzed.

**Results:** Among 765 participants, the dynapenia group had higher metabolic profiles, body fat percentage (BFP), waist circumference, and fat to muscle ratio (FMR) than the other groups, whereas the presarcopenia subjects had the lowest obesity parameters. The fallers tended to have poorer muscle function than non-fallers ( $p < 0.001$ ). The dynapenia individuals had the highest risk for MetS (odds ratio [OR]= 5.79; 95% confidence interval [CI]= 2.45-13.73), and the highest fall risk (OR= 3.11; 95% CI=1.41-6.87). Among obesity parameters, FMR had better diagnostic performance to estimate low muscle function, followed by BFP.

**Conclusion:** Dynapenia individual had higher risk of obese-related adverse events. Increased adiposity irrespective of muscle mass is relevant to reduced muscle function among elders.

## INTRODUCTION

The impact of muscle mass or muscle strength on functional disability has attracted high levels of attention in the medical community [1–3]. In 1989, Rosenberg described the concept of aging-related skeletal muscle mass decline [4]. In addition, some

studies have addressed the influence of muscle strength on functional loss and clinical events in recent years [5–7]. Muscle mass and muscle strength have been discussed together since presarcopenia and sarcopenia were defined in 2010 by the European Working Group on Sarcopenia in Older People (EWGSOP) [8]. Most researchers have recognized that both muscle quantity

and quality might have equal contributions to clinical adverse events. Older adults with sarcopenia, or even more with severe sarcopenia, tended to have a higher risk of morbidity and mortality [9].

Beyond the concepts of presarcopenia and sarcopenia, Clark and colleagues had innovatively described the concept of low muscle strength without low muscle mass as dynapenia [10]. In line with this definition, a meta-analysis from 42 longitudinal studies explored the idea that low muscle strength tended to play a more critical role in functional decline and poor health outcomes than low muscle mass among older adults [11]. In contrast, the other study found that both low muscle mass and low muscle strength played a synergistic effect in increasing the risk of losing physical independence [12]. However, studies comparing the impact on clinical adverse events among dynapenia, presarcopenia and sarcopenia in older individuals are scarce [13, 14].

Along with skeletal muscle loss, increased fat mass is another issue that has been extensively investigated in recent years. In fact, high percentage of older adults who suffer from sarcopenia had obesity [15]. Some reports revealed that obesity appeared in older adults with dynapenia [16, 17]. However, different body fat profiles of older people characterized as having presarcopenia, dynapenia or sarcopenia have not been compared. The fat and muscle effects on metabolic risk and clinical adverse event such as fall among people with dynapenia, presarcopenia and sarcopenia have rarely been explored as well. Fall risk estimation is a major and common outcome in geriatric syndrome leading to further functional decline. Nevertheless, different parameters and cutoff values composed of different definitions of sarcopenia and dynapenia to examine this issue. We tried to further examine whether muscle function is a major determinant factor more than muscle mass on fall risk. We hypothesized that low muscle function increased the risk of adverse clinical events; whereas adiposity is implicated in its association. The aim of this study was to examine the relationships of different measurements of body fat and the related risks of metabolic syndrome and fall event in community-dwelling older adults who were at different levels of dynapenia and sarcopenia. In addition, we explored which adiposity parameter is the most relevant determinant for reduced muscle function.

## RESULTS

### Baseline characteristics

There were 3300 older adults who visited our medical center in Taipei City for an annual routine check-up

were eligible. After screening for exclusion criteria, there were 198 old adults unable to perform physical exercise due to disability (n=198), and 2337 old adults with unwillingness to join this study (n=2337); hence, there were 765 old adults entered our study. In addition, there were 297 participants with incomplete data of fall history (n=297); therefore, 468 participants contributed data to the fall risk analysis (Figure 1). They were categorized into 4 groups: robust, dynapenia, presarcopenia and sarcopenia based on their muscle mass and function as in Table 1. In general, the participants with dynapenia tended to have the highest BMI, waist circumference, fat mass, BFP and FMR as well as the highest rate of metabolic syndrome among the four groups, whereas presarcopenia individuals had the lowest obesity profile and rate of metabolic syndrome among the four groups (Table 1). In terms of certain body compositions, such as BMI, waist circumference and SMI, the robust and dynapenia can be categorized as a group (normal muscle mass group); whereas the presarcopenia and sarcopenia can be grouped together (low muscle mass group). In contrast, for BFP and FMR, the sarcopenia group was similar to the dynapenia group (low muscle strength group), while the presarcopenia was similar to the robust (normal muscle strength group).

### Metabolic syndrome in dynapenia, presarcopenia and sarcopenia

The risks of metabolic syndrome were analyzed using the presarcopenic group as the reference. The dynapenic older adults had the highest rate of metabolic syndrome than the participants in robust and sarcopenia groups (Odds Ratio [OR]= 6.12, 95% confidence interval [CI]= 2.62-14.33; OR= 5.24, 95% CI= 2.35-11.72; and OR= 3.21, 95% CI=1.30-7.94, respectively). This finding was consistent even after performing adjustments with multiple covariates in further statistical analyses (Table 2).

### Fall risk in subgroup analysis

Among these older adults, 468 participants with complete records of fall history were used for the subgroup fall risk analysis. The participants with fall history (n= 60) tended to have lower grip strength and slower gait speed than the non-faller individuals. Gender, metabolic syndrome, body compositions such as SMI, fat mass, BFP and FMR revealed no significant differences between the fallers and non-fallers (Table 3). Fall risk was significantly associated with grip strength and gait speed in a negative manner (OR= 0.92, 95% CI =0.88-0.97; and OR= 0.30, 95% CI = 0.11-0.78, respectively) by logistic regression analyses with adjustment with age, gender, health

behaviors, metabolic syndrome, physical activities, osteoporosis, arthritis, and use of anti-psychotics or sedative agents. In contrast, no significant relationship was observed between fall risk and all kinds of obesity related body compositions.

The participants with dynapenia had the highest fall events than the other groups (17 individuals, 23.6%), whereas the subjects with presarcopenia had the lowest fall events (6 individuals, 7.9%). In fact, the fall rate of robust was similar to that of presarcopenia, while the fall rate of sarcopenia was similar to that of dynapenia (Table 4). The OR of fall events among the participants with dynapenia, presarcopenia and sarcopenia were 3.21 (95% CI= 1.54-6.64), 0.92 (95% CI= 0.35-2.39), and 2.74 (95% CI= 1.24-6.05), respectively. The fall risk was still higher in the dynapenia group than in the sarcopenia group after multiple covariates were adjusted in further analyses (OR= 3.11, 95% CI= 1.41-6.87; and

OR= 2.80, 95% CI=1.18-6.69, respectively) (Table 4). These results suggest that muscle strength is more relevant than body compositions, including muscle mass in view of fall risk.

### Diagnostic performance of adiposity on low muscle function

Among various obesity parameters, BMI, BFP and FMR had significant diagnostic performance on low handgrip strength and low gait speed. However, WC and fat mass had significant diagnostic performance only on low gait speed but not on low handgrip strength (Table 5). In estimating the risk for low handgrip strength, FMR had the best diagnostic performance among these obese parameters (AUC= 0.617, 95% CI = 0.573-0.661). In the prediction of low gait speed, the best diagnostic performance was still FMR (AUC= 0.622, 95% CI =0.563-0.682) than by the other obese

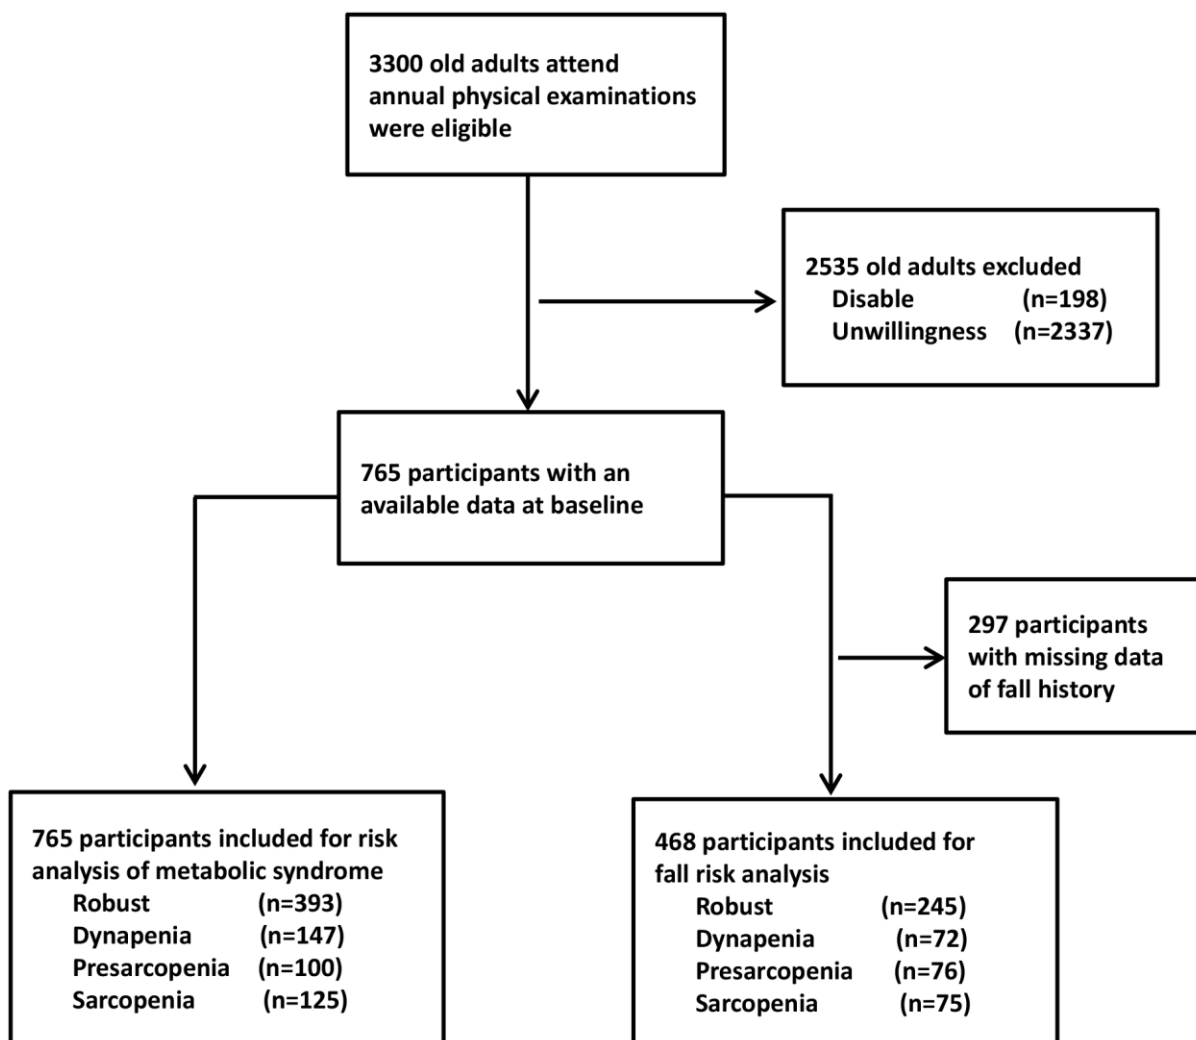

Figure 1. Flowchart of the sample selection in the study.

**Table 1. Characteristics of the participants categorized by muscle mass and muscle strength.**

|                                    | Normal muscle mass     |                     | Low muscle mass        |                     | p-value |
|------------------------------------|------------------------|---------------------|------------------------|---------------------|---------|
|                                    | normal muscle strength | low muscle strength | normal muscle strength | low muscle strength |         |
|                                    | Robust n=393           | Dynapenia n=147     | Presarcopenia n=100    | Sarcopenia n=125    |         |
| Continuous variables *             |                        |                     |                        |                     |         |
| Age (yrs)                          | 71.08±6.18             | 74.88±7.83          | 73.23±7.29             | 78.25±7.85          | <0.001  |
| BMI (kg/m <sup>2</sup> )           | 25.19±3.03             | 26.45±3.49          | 21.67±2.36             | 22.2±2.83           | <0.001  |
| Waist circumference (cm)           | 82.57±9.53             | 84.85±9.64          | 74.44±7.99             | 77.05±8.96          | <0.001  |
| SBP (mmHg)                         | 131.85±15.68           | 133.69±15.57        | 129.44±17.37           | 130.42±16.81        | 0.19    |
| Grip strength (kg)                 | 29.6±8.48              | 19.51±7.2           | 26.67±6.81             | 16.73±6.04          | <0.001  |
| Gait speed (m/s)                   | 1.31±0.31              | 0.91±0.34           | 1.32±0.26              | 0.97±0.32           | <0.001  |
| Physical activity(kcal/week)       | 8913.8±2830.2          | 8252.1±2998.8       | 9305.9±3330.2          | 8433.7±2551.7       | 0.013   |
| SMI (kg/m <sup>2</sup> )           | 7.1±0.91               | 6.95±0.93           | 5.71±1.09              | 5.39±1.21           | <0.001  |
| Fat mass(kg)                       | 20.18±6.07             | 22.4±6.96           | 15.51±4.23             | 17.29±5.42          | <0.001  |
| Body fat (%)                       | 30.6±7.24              | 33.95±7.74          | 29.11±6.98             | 32.29±7.45          | <0.001  |
| Fat/muscle ratio                   | 0.85±0.3               | 1.0±0.34            | 0.81±0.28              | 0.95±0.31           | <0.001  |
| HDL(mg/dL)                         | 54.59±14.2             | 54.78±12.7          | 61.27±15.17            | 57.8±14.73          | <0.001  |
| LDL(mg/dL)                         | 108.81±28.59           | 106.67±29.18        | 117.01±32.31           | 105.59±27.91        | 0.022   |
| Uric acid (mg/dL)                  | 5.77±1.36              | 5.54±1.34           | 5.33±1.3               | 5.5±1.33            | 0.017   |
| TG (mg/dL)                         | 118.79±62.36           | 109.89±46.04        | 98.96±38.86            | 107.58±49.09        | 0.008   |
| Fasting Sugar(mg/dL)               | 102.09±19.94           | 104.46±22.52        | 98.05±16.02            | 101.75±25.42        | 0.151   |
| Categorical variables †            |                        |                     |                        |                     |         |
| Male                               | 190(48.3)              | 53(36.1)            | 42(42)                 | 40(32)              | 0.003   |
| Smoker                             | 16(4.1)                | 2(1.4)              | 0                      | 0                   | 0.788   |
| Alcohol consumption ≥4 times/month | 41(10.4)               | 6(4.1)              | 4(4)                   | 1(0.8)              | 0.724   |
| Metabolic syndrome                 | 107(27.2)              | 45(30.6)            | 7(7)                   | 23(18.4)            | <0.001  |
| Hypertension                       | 148(37.7)              | 76(51.7)            | 23(23)                 | 55(44)              | <0.001  |
| Diabetes                           | 49(12.5)               | 33(22.4)            | 10(10)                 | 19(15.2)            | 0.015   |
| Stroke                             | 5(1.3)                 | 5(3.4)              | 1(1)                   | 6(4.8)              | 0.069   |
| CAD                                | 21(5.3)                | 19(12.9)            | 6(6)                   | 11(8.8)             | 0.001   |
| Arthritis                          | 83(21.1)               | 44(29.9)            | 19(19)                 | 33(26.4)            | 0.088   |
| Osteoporosis                       | 60(15.3)               | 34(23.1)            | 19(19)                 | 29(23.2)            | 0.820   |
| Anti-psychotics                    | 5(1.3)                 | 3(2)                | 1(1)                   | 6(4.8)              | 0.016   |
| Sedative agents                    | 63(16)                 | 38(25.9)            | 24(24)                 | 30(24)              | 0.027   |

\*Values in the continuous variables were expressed as mean ± standard deviation unless otherwise specified. BMI, body mass index; CAD, coronary artery disease; HDL, high-density lipoprotein; LDL, low-density lipoprotein; SBP, systolic blood pressure; SMI, skeletal muscle mass index; TG, triglyceride † Values in the categorical variables were expressed as number (percent).

**Table 2. Risk of metabolic syndrome in the participants with dynapenia, presarcopenia and sarcopenia.**

| Models* | Robust n=393      |         | Dynapenia n=147   |         | Presarcopenia n=100 | Sarcopenia n=125 |         |
|---------|-------------------|---------|-------------------|---------|---------------------|------------------|---------|
|         | OR (95% CI)       | p-value | OR (95% CI)       | p-value |                     | OR (95% CI)      | p-value |
| Model 1 | 5.24 (2.35-11.72) | <0.001  | 6.12 (2.62-14.33) | <0.001  | 1.00(Ref.)          | 3.21 (1.30-7.94) | 0.012   |
| Model 2 | 4.79 (2.13-10.79) | <0.001  | 5.79 (2.45-13.73) | <0.001  | 1.00(Ref.)          | 2.95 (1.18-7.36) | 0.021   |

\*Adjusted covariates: Model 1= age, gender; Model 2=Model 1+ health behaviors (smoking and alcohol consumption), physical activities, uric acid, stroke and coronary artery disease; CI, confidence interval; OR, odds ratio; Ref, reference.

**Table 3. The comparison between the participants with or without fall history.**

|                              | <b>Faller n=60</b> | <b>Non-faller n=408</b> | <b>p-value</b> |
|------------------------------|--------------------|-------------------------|----------------|
| Male, n (%)                  | 23 (38.3)          | 175 (42.8)              | 0.505          |
| Handgrip strength (kg)       | 22.03±9.28         | 26.48±9.27              | 0.001          |
| Low handgrip strength, n (%) | 26 (43.3)          | 83 (20.3)               | <0.001         |
| Gait speed (m/s)             | 1.0±0.38           | 1.19±0.36               | <0.001         |
| Slow gait speed, n (%)       | 21 (35)            | 53 (12.9)               | <0.001         |
| BMI (kg/m <sup>2</sup> )     | 24.71± 4.35        | 24.40± 3.43             | 0.534          |
| Waist circumference (cm)     | 83.54± 11.25       | 81.30± 9.72             | 0.110          |
| SMI (kg/m <sup>2</sup> )     | 6.19±1.84          | 6.53±1.19               | 0.062          |
| Fat mass (kg)                | 19.88±7.26         | 19.52±6.32              | 0.690          |
| Body fat (%)                 | 32.35±6.91         | 31.61±7.54              | 0.484          |
| FMR                          | 0.93±0.32          | 0.89±0.32               | 0.496          |
| Metabolic syndrome, n (%)    | 12 (20)            | 98 (24)                 | 0.484          |

Values were expressed as mean ± standard deviation or number (percent). BMI, body mass index; SMI, skeletal muscle mass index; FMR, fat to muscle ratio.

**Table 4. Associations of fall risk between the participants with dynapenia, presarcopenia and sarcopenia.**

|            | <b>Robust<br/>n=245</b> | <b>Dynapenia n=72</b> |         | <b>Presarcopenia<br/>n=76</b> |         | <b>Sarcopenia<br/>n=75</b> |         | <b>p-value</b> |
|------------|-------------------------|-----------------------|---------|-------------------------------|---------|----------------------------|---------|----------------|
| Fall, n(%) | 20(8.1)                 | 17(23.6)              |         | 6(7.9)                        |         | 17(22.7)                   |         | <0.001         |
| Models*    |                         | OR (95% CI)           | p-value | OR (95% CI)                   | p-value | OR (95% CI)                | p-value |                |
| Model 1    | 1.00(Ref.)              | 3.21 (1.54-6.64)      | 0.002   | 0.92 (0.35-2.39)              | 0.859   | 2.74 (1.24-6.05)           | 0.013   |                |
| Model 2    | 1.00(Ref.)              | 3.11 (1.41-6.87)      | 0.005   | 0.85 (0.31-2.29)              | 0.744   | 2.80 (1.18-6.69)           | 0.020   |                |

\*Adjusted covariates: Model 1= age, gender; Model 2=Model 1+ health behaviors (smoking and alcohol consumption), metabolic syndrome, physical activities, osteoporosis, arthritis, use of anti-psychotic agents and sedative agents. CI, confidence interval; OR, odds ratio; Ref, reference.

**Table 5. Diagnostic performance of different obese parameters on low handgrip strength and low gait speed.**

|                          | <b>Low handgrip strength</b> |                | <b>Low gait speed</b> |                |
|--------------------------|------------------------------|----------------|-----------------------|----------------|
|                          | <b>AUC (95%CI)</b>           | <b>p-value</b> | <b>AUC (95%CI)</b>    | <b>p-value</b> |
| BMI (kg/m <sup>2</sup> ) | 0.551 (0.504-0.598)          | 0.029          | 0.567 (0.508-0.627)   | 0.024          |
| WC (cm)                  | 0.523 (0.476-0.569)          | 0.328          | 0.587 (0.529-0.645)   | 0.004          |
| Fat mass (kg)            | 0.501 (0.455-0.546)          | 0.977          | 0.567 (0.507-0.627)   | 0.026          |
| Body fat percentage (%)  | 0.601 (0.556-0.646)          | <0.001         | 0.613 (0.553-0.673)   | <0.001         |
| Fat / muscle ratio       | 0.617 (0.573-0.661)          | <0.001         | 0.622 (0.563-0.682)   | <0.001         |

AUC, area under the curve; BMI, body mass index; CI, confidence interval; WC, waist circumference.

parameters. Although BFP was the second best, its performances were close to those of FMR (Table 5, Supplementary Figure 1). These data suggest obesity irrespective of muscle mass (dynapenic or sarcopenic obesity) is relevant to reduced muscle function, especially for lower extremity in the elderly.

## DISCUSSION

In this study, we found that participants with dynapenia had the highest obesity profile among all groups, whereas the presarcopenia group had the lowest obesity

characteristics. Previously, it was proposed that visceral and intermuscular adiposity increased concomitantly with skeletal muscle mass reduction during the aging process [18, 19]. In this study, it is evident that increased levels of fat mass were associated with dynapenia, a status defined solely by muscle function loss, without muscle mass reduction. Therefore, the loss of muscle function was associated with multiple obesity parameters, such as increased BMI, WC, fat mass, BFP, and especially FMR. In contrast, older adults with only loss of muscle mass, presarcopenia, tended to have good muscle function and higher physical activity.



This raised concerns about why individuals with dynapenia tended to be obese. In our study, older adults with dynapenia had lower physical activity than those with sarcopenia, whereas those with presarcopenia had the highest physical activity among the four groups. This may partially explain why the dynapenic participants had much higher obesity parameters. In addition, some studies have explored whether the aging process increases lipid deposition in intermuscular and intramuscular regions [20, 21]. Fat infiltration into skeletal muscle may lead to muscle strength decline, metabolic dysregulation, and mobility limitation in older adults [20, 22–24]. In a C<sub>2</sub>C<sub>12</sub> myotube model, insulin resistance was induced by treatment with palmitate. Intermuscular or intramyocellular lipids leading to the dysregulation of insulin signaling are characterized by abundant diacylglycerol (DAG) and ceramide accumulation [25, 26]. Fat infiltration into the muscle is associated with increased muscular expression of Perilipin2 with age in humans [27]. Evidence from these studies provides a possible mechanistic link among fat infiltration into the muscle, muscle function decline and the consequences of metabolic dysregulations. In our study, FMR followed by BFP seemed to be more relevant in representing the risk for low muscle strength than the other obesity parameters such as BMI, waist circumference or total fat mass.

In our study, we found that dynapenic older adults had a higher metabolic risk than sarcopenic individuals, whereas the individuals in the presarcopenic group had the lowest metabolic risk. Previously it was reported that aged adults with lower muscle mass had higher risk of metabolic syndrome, mainly in females [28]. Individuals with a low appendicular muscle mass to body weight ratio had a higher prevalence of metabolic syndrome in Korean population [29]. Kawamoto R et al. found that handgrip strength was inversely associated with metabolic syndrome among community-dwelling middle-aged and older persons [30]. Negative correlations between muscle mass, muscle strength and metabolic syndrome, independent of insulin resistance and central fat deposition were documented in Australian men aged 38-81 years [31]. In our study, we compared the impact of muscle mass and muscle function together for the risk of metabolic syndrome. We found that muscle function conferred a higher risk of metabolic syndrome independent of muscle mass. Previous studies reported that old adults with dynapenic obesity had a higher incidence of metabolic syndrome [32] or type 2 diabetes [33]. However, these studies defined dynapenia by low muscle strength only, without considering muscle mass. In addition, sarcopenia increased the risk of metabolic syndrome by 2.01-fold in middle-aged and older non-obese people was

observed in a meta-analysis [34]. But in these analyses, obesity profiles were not considered either.

Participants with fall history tended to have lower handgrip strength and slower gait speed than non-fallers. However, it revealed no significant differences between fallers and non-fallers on body compositions, although the fallers tended to have higher obesity profile. This finding further supported that muscle quality played more important role in fall event rather than muscle quantity or any other body compositions.

In regard to the relationship between muscle mass, muscle function and fall risk, different studies used different parameters and cutoff values to examine this issue [35]. In addition, the clinical definitions of sarcopenia and dynapenia also varied [36]. Some studies had their own cutoff points derived from their own participants rather than from the consensus of the AWGS or EWGSOP. We found that low muscle function alone with or without low muscle mass seemed to be more relevant to higher fall risk, which is consistent with some other reports. Ida et al. found that in older diabetic men, low handgrip strength; but not sarcopenia, was correlated with fear of falling [37]. Tanimoto et al. found that subjects with low muscle strength or performance had a slightly higher fall risk than those with reduced muscle mass in women [38]. In our study, dynapenic older adults had a higher fall risk than sarcopenic individuals even after adjusting for possible confounding factors. We also found that presarcopenic older people tended to have lower fall risk. Therefore, for fall risk, muscle function rather than muscle mass matters.

Low muscle mass alone may not be a risk factor for functional decline in the absence of obesity [36]. Scott D and colleagues showed that dynapenic obesity, but not sarcopenic obesity, was expectative of an increased fall risk scores among older adults in a five-year prospective cohort study [39]. In our study, dynapenic older adults tended to be more obese than sarcopenic individuals, and this finding may be partially linked to the result of a higher fall risk among the individuals with dynapenia.

The older people in the robust and dynapenia groups have normal muscle mass with different muscle function. Their fat mass, FMR, risks of fall and metabolic syndrome were different. In contrast, low muscle mass defined both presarcopenia and sarcopenia groups, however, the difference in muscle function was related to their distinct patterns in fat mass, FMR, risks of fall and metabolic syndrome. Taken together, these results showed muscle function seems to be more relevant to the risk of metabolic syndrome and reported

fall events, irrespectively of muscle mass itself. Obesity either dynapenic (with normal muscle mass) or sarcopenic (with reduced muscle mass) is associated with reduced muscle function.

The new EWGSOP screening protocol on sarcopenia already considers muscle strength as the first step for screening [40]; however, this revision did not emphasize that the participants with dynapenia have higher risk of clinical adverse events than the other groups. In fact, body fat measurements, the most distinguishing characteristic for muscle function decline, were rarely explored in previous reports. In addition, FMR seems to be a more suitable parameter in estimating low muscle strength and low physical performance.

Some limitations of this study need to be mentioned. The fall risk assessment was obtained by participants' self-report, and recall bias could not be avoided. All participants were enrolled from the urban community, and they were relative healthy and ambulatory. This study may not be applied to the elderly population with severe illness leading to the limited generalizability to other population. Although we have adjusted multiple covariates in the regression model; nevertheless, cognitive function and nutritional status were not available in our study bring about the restriction to minimize the possible confounding effects. In addition, this was a cross-sectional study, causal relationships between different stages of sarcopenia and their impact on clinical risks can not be inferred. Prospective studies to elucidate these relationships are warranted.

## CONCLUSIONS

Community-dwelling older people with dynapenia were more obese and had a higher risk of fall and metabolic syndrome than sarcopenia individuals. In contrast, presarcopenia older adults were less obese and had a lower risk of metabolic syndrome. Muscle function was more important than muscle mass on fall risk. Increased adiposity with or without reduced muscle mass was related to muscle function decline.

## MATERIALS AND METHODS

### Study participants

This is a cross-section observational study. From March 2015 to July 2017, adults who lived in the urban community with age of 65 and older were eligible when they attended an annual routine health check-up program at Tri-Service General Hospital (TSGH). Participants who had ever experienced chest pain or bone pain while doing exercise, had problems of

cognitive impairment or congestive heart failure, were currently under regular hemodialysis, or had a malignancy that required medical therapy, or had pacemaker implantation were excluded. They could walk by themselves from community to our medical center and they are relatively healthy in general. All old people were invited unless they refuse to join this study. All participants were requested to do physical exercise such as holding hands and walking at usual pace. If they could not do these physical exercises they were supposed not eligible to participate in this study. At first, trained investigator will screen the subjects by medical record reviewing to find out whether they have the exclusion conditions mentioned above. If they were eligible for this study, the trained investigator will invite them to participate and provide inform consent.

Information regarding the demographic profile of the participants, their overall health condition, and physical activities were obtained through a structured questionnaire. Twenty milliliters of venous blood was collected after overnight fasting. Participants' age, health behaviors such as cigarette smoking and alcohol drinking were ascertained from a personal identification card and by self-report. Alcohol consumption was defined as alcohol beverage drinking at least once every week currently and was dichotomized. Positive smoking status was indicated as ever smoking in life and was treated as categorical variable. The presence of hypertension was defined as an average blood pressure with 140/90 mmHg or higher, based on a physician's diagnosis that was self-reported or based on the use of medicines for blood pressure control. Diabetes mellitus was defined as fasting plasma glucose  $\geq 126$  mg/dl, self-report of a doctor's diagnosis, or current use of anti-diabetic medications (including oral hypoglycemic agents or insulin injection). Medical history including stroke, heart diseases, chronic lung diseases, arthritis, osteoporosis, use of antipsychotic agents or sedative agents and so forth were obtained by self-report. International Physical Activity Questionnaire Short Form (IPAQ) was used to assess participant's physical activities [41]. Participants were recorded as having a positive recent fall history if they had experienced a fall event in the past one year. All participants provided written informed consent prior to participation. The protocol was approved by the Institutional Review Board of TSGH.

### Measurement of body composition

Body weight was measured by a digital scale to the nearest 0.01kg; and body height was checked with a stadiometer to the nearest 0.1 cm. Body weight in kilograms divided by the square of body height in meters was indicated as body mass index (BMI). The

waist circumference (WC) was measured at the mid-level between the iliac crest and the lower border of the 12<sup>th</sup> rib while participant was standing with feet 25–30 cm apart. Bioelectronics impedance analyzer (BIA) was used to measure appendicular skeletal muscle (ASM) (InBody 720, Biospace, Seoul, South Korea). We used body height in meter to adjust ASM, i.e., ASM/ht<sup>2</sup>, to define the skeletal muscle mass index (SMI). We also measured body fat mass and body fat percentage (BFP) by BIA. The fat to muscle ratio (FMR) was calculated as body fat mass divided by body muscle mass. The cutoff value of low SMI was 7.0 kg/m<sup>2</sup> in men and 5.7 kg/m<sup>2</sup> in women according to the consensus from the Asia Working Group of Sarcopenia (AWGS) in 2014 [42].

### Functional performance measurement

Measurement of the average value of the dominant hand's grip strength was conducted three times by an analogue isometric dynamometer (Exacta™ Hydraulic Hand Dynamometer; North Coast Medical Inc., Gilroy, CA). Six-meter distance walking time was measured for all participants, where they were asked to go as usual or habitual walk speed. Distance divided by walking time expressed in m/s was indicated as gait speed. Based on the sarcopenia definition by AWGS in 2014, men with handgrip strength below 26 kg was defined as low handgrip strength; whereas the cutoff value of low handgrip strength for women was lower than 18 kg. The gait speed  $\leq 0.8$  m/sec in both genders is the cutoff point for low gait speed [42].

### Definition of robust, dynapenia, presarcopenia and sarcopenia

Robust was defined as having normal SMI, normal handgrip strength and normal gait speed. Participants with normal SMI but had low handgrip strength and/or low gait speed were categorized as dynapenia. Presarcopenia was defined as low SMI with normal handgrip strength and normal gait speed; sarcopenia was indicated by low SMI with either low handgrip strength or low gait speed or both, according to the consensus of European Working Group on Sarcopenia in Older People (EWGSOP) in 2010 [8]. The cutoff values of low SMI, low handgrip strength and low gait speed were consistent with the consensus of AWGS in 2014 [42].

### Definition of metabolic syndrome

We used the National Cholesterol Education Program (NECP) expert panel on the Detection, Evaluation, and Treatment of High Blood Cholesterol in Adults (Adult Treatment Panel III) guideline [43] to define metabolic

syndrome. Modified criteria of abdominal obesity for Asian people were cited from the International Diabetes Federation [44]. Metabolic syndrome was defined as having three or more of the following conditions: (1) elevated blood pressure, systolic blood pressure  $\geq 130$  mmHg or diastolic blood pressure  $\geq 85$  mmHg, or with treatment of hypertension; (2) impaired fasting glucose, fasting glucose  $\geq 100$  mg/dl, or with treatment of diabetes mellitus; (3) hypertriglyceridemia, fasting serum triglyceride  $\geq 150$  mg/dl, or with treatment for hypertriglyceridemia; (4) low level of high-density lipoprotein, serum high-density lipoprotein  $< 40$  mg/dl in men or  $< 50$  mg/dl in women; and (5) central obesity, waist circumference  $\geq 90$  cm in men or  $\geq 80$  cm in women.

### Statistical analysis

Participants' characteristics with continuous variables were represented as the mean  $\pm$  standard deviation; whereas the categorical data were expressed as numbers with percentages. ANOVA was conducted to examine the differences of continuous variables among robust, dynapenia, presarcopenia and sarcopenia groups. Student-t test was performed to examine the differences of muscle strength, body compositions between faller and non-faller groups. We used multiple logistic regression analysis to examine the risk of metabolic syndrome and fall event among those with dynapenia, presarcopenia and sarcopenia. In the risk analysis of metabolic syndrome, we adjusted multiple covariates by an extended-model approach: Model 1 = age and gender; Model 2 = Model 1 plus behaviors of personal health (cigarette smoking and current alcohol consumption), physical activities, uric acid, stroke and coronary artery disease. Different covariate adjustments were also applied for fall risk estimation: Model 1 = age and gender; Model 2 = Model 1 plus behaviors of personal health (cigarette smoking and current alcohol drinking), metabolic syndrome, physical activities, osteoporosis, arthritis, and use of antipsychotic agents and sedative agents. By calculating the area under the curve (AUC) in receiver operating characteristic (ROC) analysis, we assessed the diagnostic performance of different obese parameters on low handgrip strength and low gait speed. We used Statistics Package for Social Science version 16.0 software (SPSS, Inc., Chicago, IL) to conduct all analyses.

### AUTHOR CONTRIBUTION

TWK designed the study, analyzed and interpreted the data, and the manuscript writing. WLC conceived the study design, participant recruitment, data acquisition and interpretation. WSY contributed to study design,



data interpretation and revised the manuscript. TCP contributed to data acquisition. DSH and CLC contributed to perform the statistical analysis and data interpretation. All authors read, critically reviewed, and approved the final manuscript.

## ACKNOWLEDGMENTS

The author would like to acknowledge all participants in annual health examination in Taipei.

## CONFLICTS OF INTEREST

The authors declare that they have no conflicts of interest.

## FUNDING

This study was supported by grant MOST 104-2314-B-016 -011 -MY3 from the Ministry of Science and Technology (MOST) in Taiwan.

## REFERENCES

1. Legrand D, Vaes B, Matheï C, Adriaensen W, Van Pottelbergh G, Degryse JM. Muscle strength and physical performance as predictors of mortality, hospitalization, and disability in the oldest old. *J Am Geriatr Soc*. 2014; 62:1030–38.  
<https://doi.org/10.1111/jgs.12840>  
PMID:24802886
2. Roshanravan B, Patel KV, Fried LF, Robinson-Cohen C, de Boer IH, Harris T, Murphy RA, Satterfield S, Goodpaster BH, Shlipak M, Newman AB, Kestenbaum B, and Health ABC study. Association of muscle endurance, fatigability, and strength with functional limitation and mortality in the health aging and body composition study. *J Gerontol A Biol Sci Med Sci*. 2017; 72:284–91.  
<https://doi.org/10.1093/gerona/glw210>  
PMID:27907890
3. von Haehling S, Morley JE, Anker SD. An overview of sarcopenia: facts and numbers on prevalence and clinical impact. *J Cachexia Sarcopenia Muscle*. 2010; 1:129–33.  
<https://doi.org/10.1007/s13539-010-0014-2>  
PMID:21475695
4. Rosenberg IH. Summary comments. *Am J Clin Nutr*. 1989; 50:1231–33.  
<https://doi.org/10.1093/ajcn/50.5.1231>
5. Moreland JD, Richardson JA, Goldsmith CH, Clase CM. Muscle weakness and falls in older adults: a systematic review and meta-analysis. *J Am Geriatr Soc*. 2004; 52:1121–29.  
<https://doi.org/10.1111/j.1532-5415.2004.52310.x>  
PMID:15209650
6. Newman AB, Kupelian V, Visser M, Simonsick EM, Goodpaster BH, Kritchevsky SB, Tyllavsky FA, Rubin SM, Harris TB. Strength, but not muscle mass, is associated with mortality in the health, aging and body composition study cohort. *J Gerontol A Biol Sci Med Sci*. 2006; 61:72–77.  
<https://doi.org/10.1093/gerona/61.1.72>  
PMID:16456196
7. Gale CR, Martyn CN, Cooper C, Sayer AA. Grip strength, body composition, and mortality. *Int J Epidemiol*. 2007; 36:228–35.  
<https://doi.org/10.1093/ije/dyl224>  
PMID:17056604
8. Cruz-Jentoft AJ, Baeyens JP, Bauer JM, Boirie Y, Cederholm T, Landi F, Martin FC, Michel JP, Rolland Y, Schneider SM, Topinková E, Vandewoude M, Zamboni M, and European Working Group on Sarcopenia in Older People. Sarcopenia: European consensus on definition and diagnosis: report of the European working group on sarcopenia in older people. *Age Ageing*. 2010; 39:412–23.  
<https://doi.org/10.1093/ageing/afq034>  
PMID:20392703
9. Brown JC, Harhay MO, Harhay MN. Sarcopenia and mortality among a population-based sample of community-dwelling older adults. *J Cachexia Sarcopenia Muscle*. 2016; 7:290–98.  
<https://doi.org/10.1002/jcsm.12073> PMID:27239410
10. Clark BC, Manini TM. Sarcopenia =/= dynapenia. *J Gerontol A Biol Sci Med Sci*. 2008; 63:829–34.  
<https://doi.org/10.1093/gerona/63.8.829>  
PMID:18772470
11. Schaap LA, Koster A, Visser M. Adiposity, muscle mass, and muscle strength in relation to functional decline in older persons. *Epidemiol Rev*. 2013; 35:51–65.  
<https://doi.org/10.1093/epirev/mxs006>  
PMID:23221972
12. Dos Santos L, Cyrino ES, Antunes M, Santos DA, Sardinha LB. Sarcopenia and physical independence in older adults: the independent and synergic role of muscle mass and muscle function. *J Cachexia Sarcopenia Muscle*. 2017; 8:245–50.  
<https://doi.org/10.1002/jcsm.12160>  
PMID:27897417
13. Aubertin-Leheudre M, Anton S, Beavers DP, Manini TM, Fielding R, Newman A, Church T, Kritchevsky SB, Conroy D, McDermott MM, Botosaneanu A, Hauser ME, Pahor M, and LIFE Research Group. Dynapenia and metabolic health in obese and nonobese adults aged 70 years and older: the LIFE study. *J Am Med Dir Assoc*. 2017; 18:312–19.  
<https://doi.org/10.1016/j.jamda.2016.10.001>  
PMID:27914851

14. Iwamura M, Kanauchi M. A cross-sectional study of the association between dynapenia and higher-level functional capacity in daily living in community-dwelling older adults in Japan. *BMC Geriatr.* 2017; 17:1. <https://doi.org/10.1186/s12877-016-0400-5> PMID:[28049446](https://pubmed.ncbi.nlm.nih.gov/28049446/)
15. Prado CM, Wells JC, Smith SR, Stephan BC, Siervo M. Sarcopenic obesity: a critical appraisal of the current evidence. *Clin Nutr.* 2012; 31:583–601. <https://doi.org/10.1016/j.clnu.2012.06.010> PMID:[22809635](https://pubmed.ncbi.nlm.nih.gov/22809635/)
16. Jensen GL, Friedmann JM. Obesity is associated with functional decline in community-dwelling rural older persons. *J Am Geriatr Soc.* 2002; 50:918–23. <https://doi.org/10.1046/j.1532-5415.2002.50220.x> PMID:[12028181](https://pubmed.ncbi.nlm.nih.gov/12028181/)
17. S n chal M, Dionne IJ, Brochu M. Dynapenic abdominal obesity and metabolic risk factors in adults 50 years of age and older. *J Aging Health.* 2012; 24:812–26. <https://doi.org/10.1177/0898264312440324> PMID:[22451528](https://pubmed.ncbi.nlm.nih.gov/22451528/)
18. Song MY, Ruts E, Kim J, Janumala I, Heymsfield S, Gallagher D. Sarcopenia and increased adipose tissue infiltration of muscle in elderly African American women. *Am J Clin Nutr.* 2004; 79:874–80. <https://doi.org/10.1093/ajcn/79.5.874> PMID:[15113728](https://pubmed.ncbi.nlm.nih.gov/15113728/)
19. Roubenoff R. Sarcopenic obesity: does muscle loss cause fat gain? Lessons from rheumatoid arthritis and osteoarthritis. *Ann N Y Acad Sci.* 2000; 904:553–57. <https://doi.org/10.1111/j.1749-6632.2000.tb06515.x> PMID:[10865804](https://pubmed.ncbi.nlm.nih.gov/10865804/)
20. Marcus RL, Addison O, Kidde JP, Dibble LE, Lastayo PC. Skeletal muscle fat infiltration: impact of age, inactivity, and exercise. *J Nutr Health Aging.* 2010; 14:362–66. <https://doi.org/10.1007/s12603-010-0081-2> PMID:[20424803](https://pubmed.ncbi.nlm.nih.gov/20424803/)
21. Delmonico MJ, Harris TB, Visser M, Park SW, Conroy MB, Velasquez-Mieyer P, Boudreau R, Manini TM, Nevitt M, Newman AB, Goodpaster BH, and Health, Aging, and Body. Longitudinal study of muscle strength, quality, and adipose tissue infiltration. *Am J Clin Nutr.* 2009; 90:1579–85. <https://doi.org/10.3945/ajcn.2009.28047> PMID:[19864405](https://pubmed.ncbi.nlm.nih.gov/19864405/)
22. Goodpaster BH, Carlson CL, Visser M, Kelley DE, Scherzinger A, Harris TB, Stamm E, Newman AB. Attenuation of skeletal muscle and strength in the elderly: The Health ABC Study. *J Appl Physiol (1985).* 2001; 90:2157–65. <https://doi.org/10.1152/jappl.2001.90.6.2157> PMID:[11356778](https://pubmed.ncbi.nlm.nih.gov/11356778/)
23. Goodpaster BH, Thaete FL, Kelley DE. Thigh adipose tissue distribution is associated with insulin resistance in obesity and in type 2 diabetes mellitus. *Am J Clin Nutr.* 2000; 71:885–92. <https://doi.org/10.1093/ajcn/71.4.885> PMID:[10731493](https://pubmed.ncbi.nlm.nih.gov/10731493/)
24. Visser M, Goodpaster BH, Kritchevsky SB, Newman AB, Nevitt M, Rubin SM, Simonsick EM, Harris TB. Muscle mass, muscle strength, and muscle fat infiltration as predictors of incident mobility limitations in well-functioning older persons. *J Gerontol A Biol Sci Med Sci.* 2005; 60:324–33. <https://doi.org/10.1093/gerona/60.3.324> PMID:[15860469](https://pubmed.ncbi.nlm.nih.gov/15860469/)
25. Chavez JA, Summers SA. Characterizing the effects of saturated fatty acids on insulin signaling and ceramide and diacylglycerol accumulation in 3T3-L1 adipocytes and C2C12 myotubes. *Arch Biochem Biophys.* 2003; 419:101–09. <https://doi.org/10.1016/j.abb.2003.08.020> PMID:[14592453](https://pubmed.ncbi.nlm.nih.gov/14592453/)
26. Boura-Halfon S, Zick Y. Phosphorylation of IRS proteins, insulin action, and insulin resistance. *Am J Physiol Endocrinol Metab.* 2009; 296:E581–91. <https://doi.org/10.1152/ajpendo.90437.2008> PMID:[18728222](https://pubmed.ncbi.nlm.nih.gov/18728222/)
27. Conte M, Vasuri F, Trisolino G, Bellavista E, Santoro A, Degiovanni A, Martucci E, D’Errico-Grigioni A, Caporossi D, Capri M, Maier AB, Seynnes O, Barberi L, et al. Increased Plin2 expression in human skeletal muscle is associated with sarcopenia and muscle weakness. *PLoS One.* 2013; 8:e73709. <https://doi.org/10.1371/journal.pone.0073709> PMID:[23977392](https://pubmed.ncbi.nlm.nih.gov/23977392/)
28. Ou YC, Chuang HH, Li WC, Tzeng IS, Chen JY. Gender difference in the association between lower muscle mass and metabolic syndrome independent of insulin resistance in a middle-aged and elderly Taiwanese population. *Arch Gerontol Geriatr.* 2017; 72:12–18. <https://doi.org/10.1016/j.archger.2017.04.006> PMID:[28505476](https://pubmed.ncbi.nlm.nih.gov/28505476/)
29. Kim YH, So WY. A low arm and leg muscle mass to total body weight ratio is associated with an increased prevalence of metabolic syndrome: The Korea National Health and Nutrition Examination Survey 2010–2011. *Technol Health Care.* 2016; 24:655–63. <https://doi.org/10.3233/THC-161162> PMID:[27163301](https://pubmed.ncbi.nlm.nih.gov/27163301/)
30. Kawamoto R, Ninomiya D, Kasai Y, Kusunoki T, Ohtsuka N, Kumagi T, Abe M. Handgrip strength is associated with metabolic syndrome among middle-aged and

- elderly community-dwelling persons. *Clin Exp Hypertens*. 2016; 38:245–51.  
<https://doi.org/10.3109/10641963.2015.1081232>  
PMID:[26818203](https://pubmed.ncbi.nlm.nih.gov/26818203/)
31. Atlantis E, Martin SA, Haren MT, Taylor AW, Wittert GA, and Members of the Florey Adelaide Male Ageing Study. Inverse associations between muscle mass, strength, and the metabolic syndrome. *Metabolism*. 2009; 58:1013–22.  
<https://doi.org/10.1016/j.metabol.2009.02.027>  
PMID:[19394973](https://pubmed.ncbi.nlm.nih.gov/19394973/)
32. Alexandre TD, Aubertin-Leheudre M, Carvalho LP, Máximo RO, Corona LP, Brito TR, Nunes DP, Santos JL, Duarte YA, Lebrão ML. Dynapenic obesity as an associated factor to lipid and glucose metabolism disorders and metabolic syndrome in older adults - findings from SABE Study. *Clin Nutr*. 2018; 37:1360–66.  
<https://doi.org/10.1016/j.clnu.2017.06.009>  
PMID:[28647293](https://pubmed.ncbi.nlm.nih.gov/28647293/)
33. Cuthbertson DJ, Bell JA, Ng SY, Kemp GJ, Kivimaki M, Hamer M. Dynapenic obesity and the risk of incident type 2 diabetes: the English Longitudinal Study of Ageing. *Diabet Med*. 2016; 33:1052–59.  
<https://doi.org/10.1111/dme.12991> PMID:[26479063](https://pubmed.ncbi.nlm.nih.gov/26479063/)
34. Zhang H, Lin S, Gao T, Zhong F, Cai J, Sun Y, Ma A. Association between sarcopenia and metabolic syndrome in middle-aged and older non-obese adults: a systematic review and meta-analysis. *Nutrients*. 2018; 10:364.  
<https://doi.org/10.3390/nu10030364> PMID:[29547573](https://pubmed.ncbi.nlm.nih.gov/29547573/)
35. Landi F, Liperoti R, Russo A, Giovannini S, Tosato M, Capoluongo E, Bernabei R, Onder G. Sarcopenia as a risk factor for falls in elderly individuals: results from the iSIRENTE study. *Clin Nutr*. 2012; 31:652–58.  
<https://doi.org/10.1016/j.clnu.2012.02.007>  
PMID:[22414775](https://pubmed.ncbi.nlm.nih.gov/22414775/)
36. Janssen I. Influence of sarcopenia on the development of physical disability: the Cardiovascular Health Study. *J Am Geriatr Soc*. 2006; 54:56–62.  
<https://doi.org/10.1111/j.1532-5415.2005.00540.x>  
PMID:[16420198](https://pubmed.ncbi.nlm.nih.gov/16420198/)
37. Ida S, Murata K, Ishihara Y, Imataka K, Kaneko R, Fujiwara R, Takahashi H. [A comparison of the associations of dynapenia and sarcopenia with fear of falling in elderly diabetic patients]. *Nihon Ronen Igakkai Zasshi*. 2017; 54:537–45.  
<https://doi.org/10.3143/geriatrics.54.537>  
PMID:[29212996](https://pubmed.ncbi.nlm.nih.gov/29212996/)
38. Tanimoto Y, Watanabe M, Sun W, Sugiura Y, Hayashida I, Kusabiraki T, Tamaki J. Sarcopenia and falls in community-dwelling elderly subjects in Japan: defining sarcopenia according to criteria of the European Working Group on Sarcopenia in Older People. *Arch Gerontol Geriatr*. 2014; 59:295–99.  
<https://doi.org/10.1016/j.archger.2014.04.016>  
PMID:[24852668](https://pubmed.ncbi.nlm.nih.gov/24852668/)
39. Scott D, Sanders KM, Aitken D, Hayes A, Ebeling PR, Jones G. Sarcopenic obesity and dynapenic obesity: 5-year associations with falls risk in middle-aged and older adults. *Obesity (Silver Spring)*. 2014; 22:1568–74.  
<https://doi.org/10.1002/oby.20734>  
PMID:[24585708](https://pubmed.ncbi.nlm.nih.gov/24585708/)
40. Cruz-Jentoft AJ, Bahat G, Bauer J, Boirie Y, Bruyère O, Cederholm T, Cooper C, Landi F, Rolland Y, Sayer AA, Schneider SM, Sieber CC, Topinkova E, et al, and Writing Group for the European Working Group on Sarcopenia in Older People 2 (EWGSOP2), and the Extended Group for EWGSOP2. Sarcopenia: revised European consensus on definition and diagnosis. *Age Ageing*. 2019; 48:16–31.  
<https://doi.org/10.1093/ageing/afy169>  
PMID:[30312372](https://pubmed.ncbi.nlm.nih.gov/30312372/)
41. Qu NN, Li KJ. [Study on the reliability and validity of international physical activity questionnaire (Chinese version, IPAQ)]. *Zhonghua Liu Xing Bing Xue Za Zhi*. 2004; 25:265–68.  
PMID:[15200945](https://pubmed.ncbi.nlm.nih.gov/15200945/)
42. Chen LK, Liu LK, Woo J, Assantachai P, Auyeung TW, Bahyah KS, Chou MY, Chen LY, Hsu PS, Krairit O, Lee JS, Lee WJ, Lee Y, et al. Sarcopenia in Asia: consensus report of the Asian working group for sarcopenia. *J Am Med Dir Assoc*. 2014; 15:95–101.  
<https://doi.org/10.1016/j.jamda.2013.11.025>  
PMID:[24461239](https://pubmed.ncbi.nlm.nih.gov/24461239/)
43. Ervin RB. Prevalence of metabolic syndrome among adults 20 years of age and over, by sex, age, race and ethnicity, and body mass index: United States, 2003–2006. *Natl Health Stat Report*. 2009; 13:1–7.  
PMID:[19634296](https://pubmed.ncbi.nlm.nih.gov/19634296/)
44. Alberti KG, Eckel RH, Grundy SM, Zimmet PZ, Cleeman JI, Donato KA, Fruchart JC, James WP, Loria CM, Smith SC Jr, and International Diabetes Federation Task Force on Epidemiology and Prevention, and National Heart, Lung, and Blood Institute, and American Heart Association, and World Heart Federation, and International Atherosclerosis Society, and International Association for the Study of Obesity. Harmonizing the metabolic syndrome: a joint interim statement of the international diabetes federation task force on epidemiology and prevention; national heart, lung, and blood institute; American heart association; world heart federation; international atherosclerosis society; and international association for the study of obesity. *Circulation*. 2009; 120:1640–45.  
<https://doi.org/10.1161/CIRCULATIONAHA.109.192644>  
PMID:[19805654](https://pubmed.ncbi.nlm.nih.gov/19805654/)

## SUPPLEMENTARY MATERIALS

### Supplementary Figure

#### Low Handgrip Strength

BMI

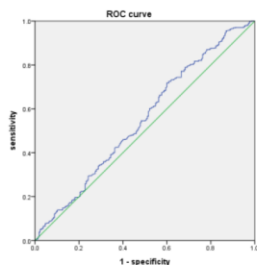

waist circumference

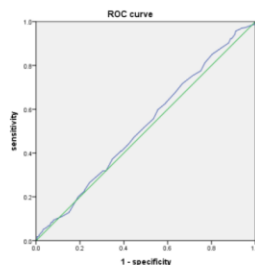

fat mass

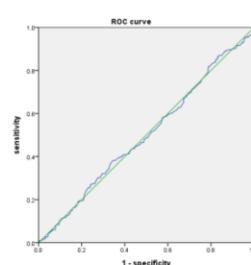

body fat percentage

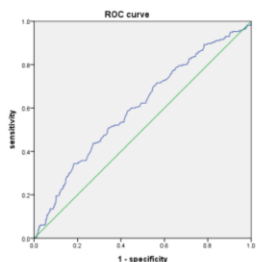

FMR

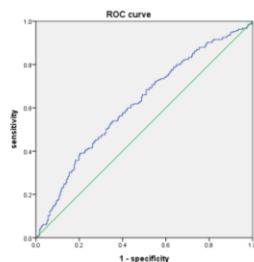

#### Low Gait Speed

BMI

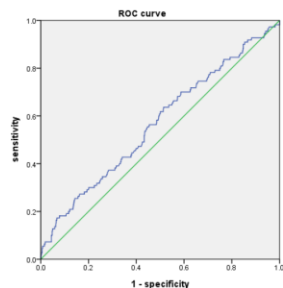

waist circumference

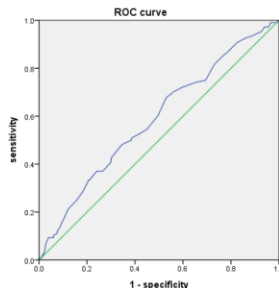

fat mass

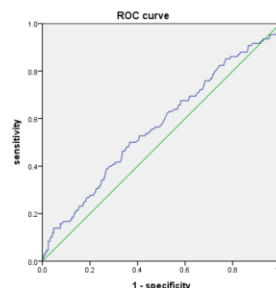

body fat percentage

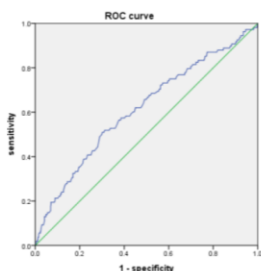

FMR

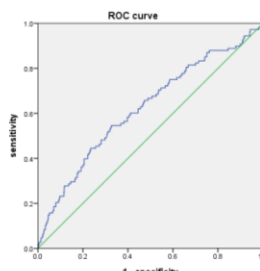

**Supplementary Figure 1. The receiver operating characteristics (ROC) curve to estimate the area under the curve (AUC) between different obesity parameter and low muscle function.** In estimating the risk for low handgrip strength, FMR had the best diagnostic performance among these obese parameters (AUC= 0.617, 95% CI = 0.573-0.661). In the prediction of low gait speed, the best diagnostic performance was still FMR (AUC= 0.622, 95% CI = 0.563-0.682) than by the other obese parameters. BMI, body mass index; CI, confidence interval; FMR, fat to muscle ratio.
