# Supplementary material for: Impact of adiposity on muscle function and clinical events among elders with dynapenia, presarcopenia and sarcopenia: a community-based cross-sectional study
Source: Aging (Albany NY). 2021 Feb 26;13(5):7247–58. doi: 10.18632/aging.202581 (PMC7993704; doi:10.18632/aging.202581)
Supplement: Supplementary Figure 1 [file aging-13-202581-s001.pdf]

## SUPPLEMENTARY FIGURE

### Low Handgrip Strength

BMI

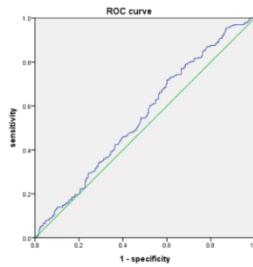

waist circumference

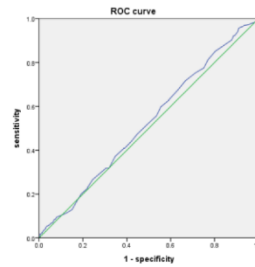

fat mass

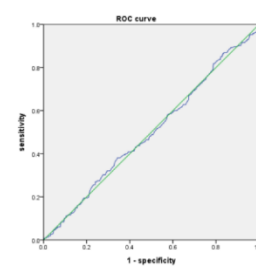

body fat percentage

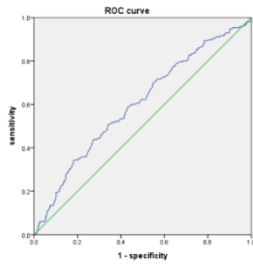

FMR

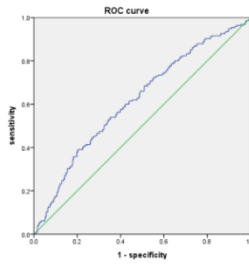

### Low Gait Speed

BMI

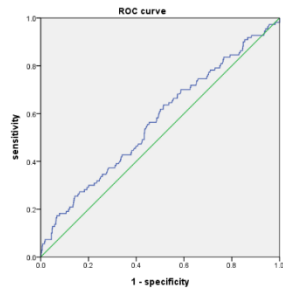

waist circumference

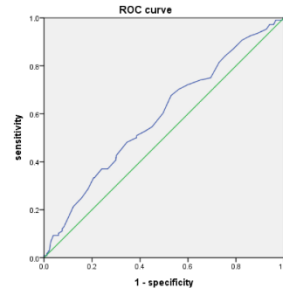

fat mass

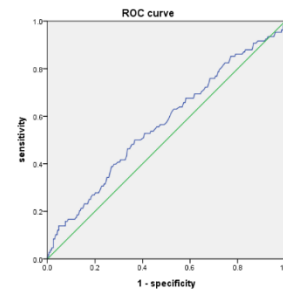

body fat percentage

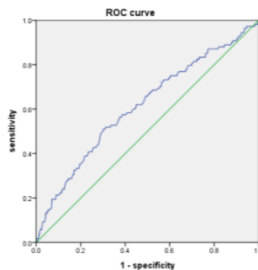

FMR

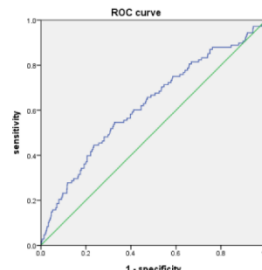

**Supplementary Figure 1. The receiver operating characteristics (ROC) curve to estimate the area under the curve (AUC) between different obesity parameter and low muscle function.** In estimating the risk for low handgrip strength, FMR had the best diagnostic performance among these obese parameters (AUC= 0.617, 95% CI = 0.573-0.661). In the prediction of low gait speed, the best diagnostic performance was still FMR (AUC= 0.622, 95% CI = 0.563-0.682) than by the other obese parameters. BMI, body mass index; CI, confidence interval; FMR, fat to muscle ratio.
